# Supplementary material
Source: PubMed Central journal article supplement (PMC4023722)
Supplement: AAC.02137-13_zac004142719so1.pdf [file AAC.02137-13_zac004142719so1.pdf]

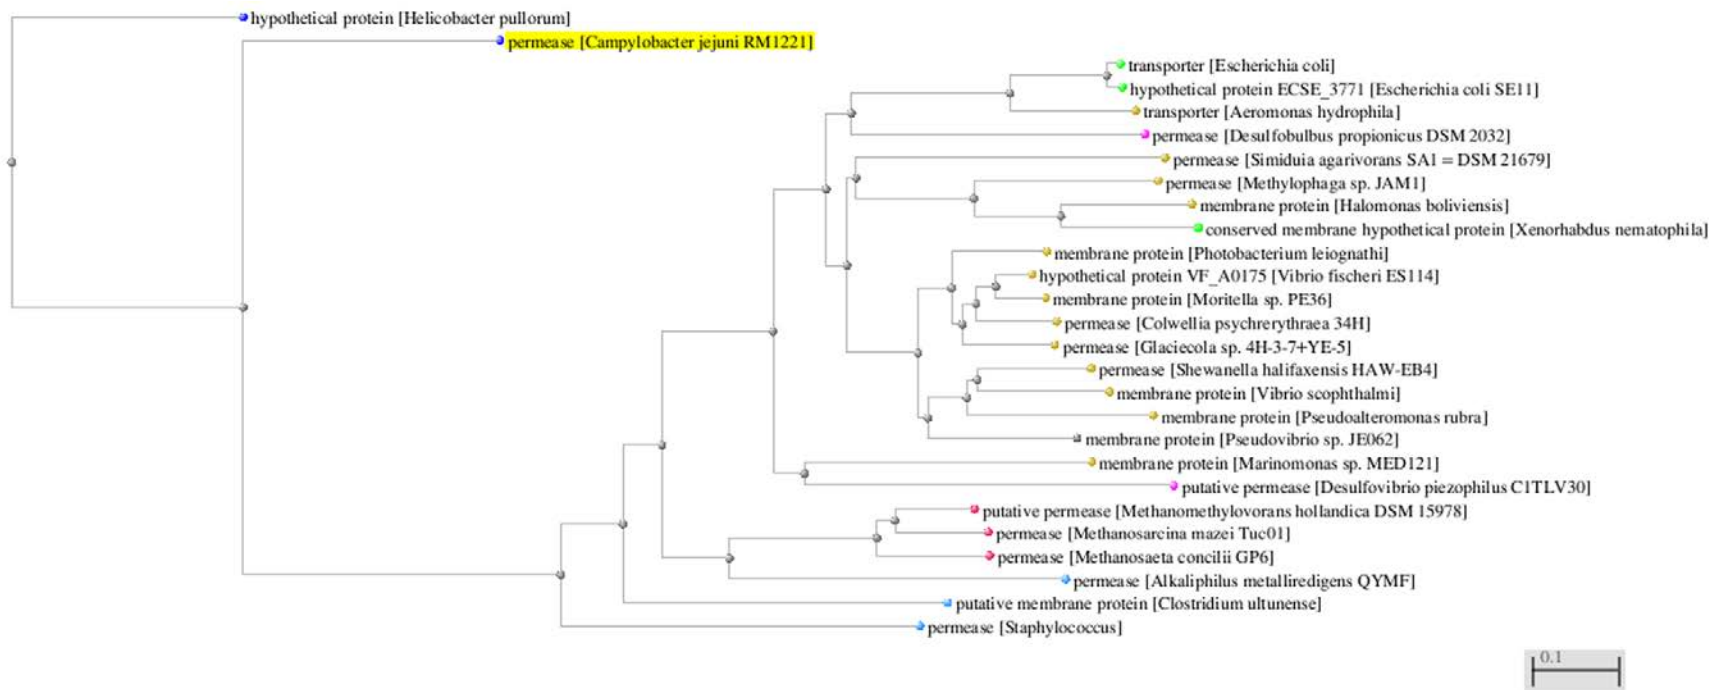

Supplementary FIG. 1. Phylogenetic analysis of full-length ArsP homologs in bacteria and archaea. The tree was generated using ArsP homologs from representative species in 27 different genera and the Fast Minimum Evolution method with Constraint-based Multiple Protein Alignment Tool (COBALT) from National Center for Biotechnology information (NCBI). The colors of the dots indicate the phyla or classes of these species. Navy blue color represents Epsilonproteobacteria. Green color represents Enterobacteria. Yellow color represents Gammaproteobacteria. Pink represents Deltaproteobacteria. Grey color represents Alphaproteobacteria. Red color represents Euryarchaeotes. Blue color represents Firmicutes.

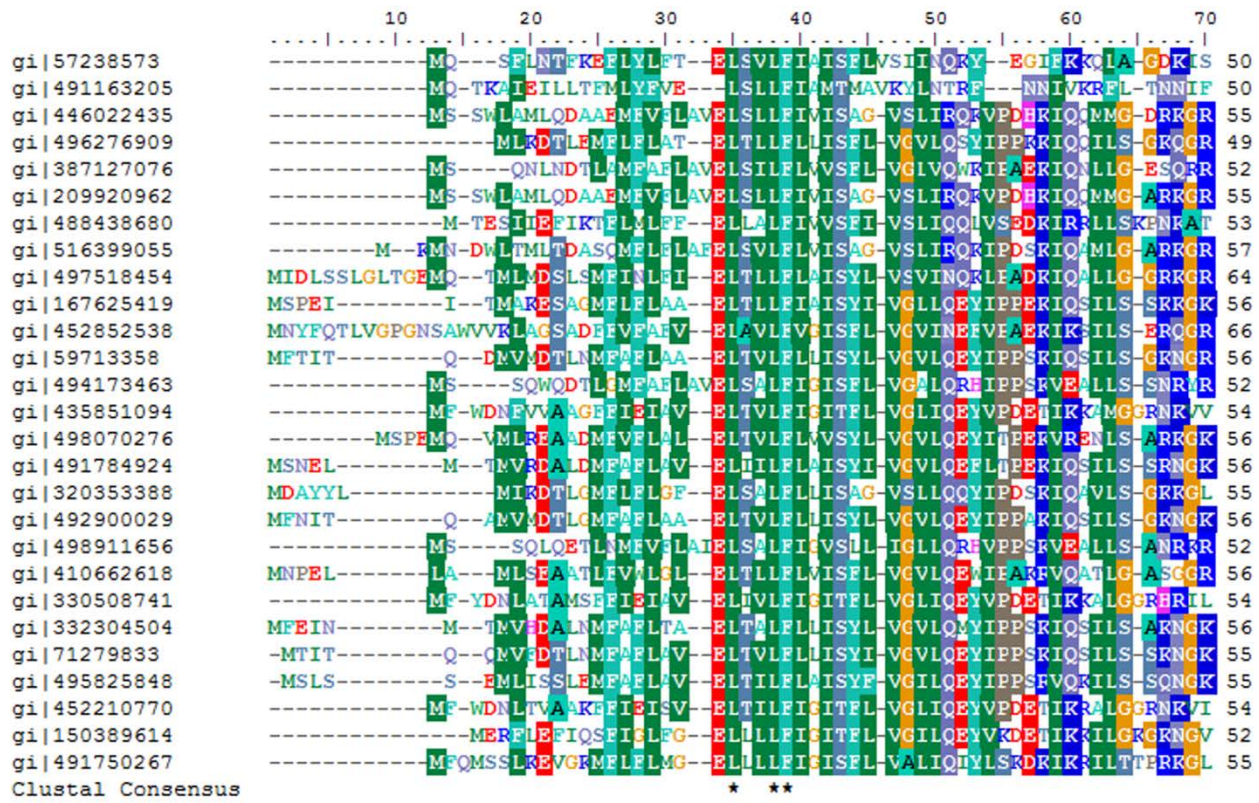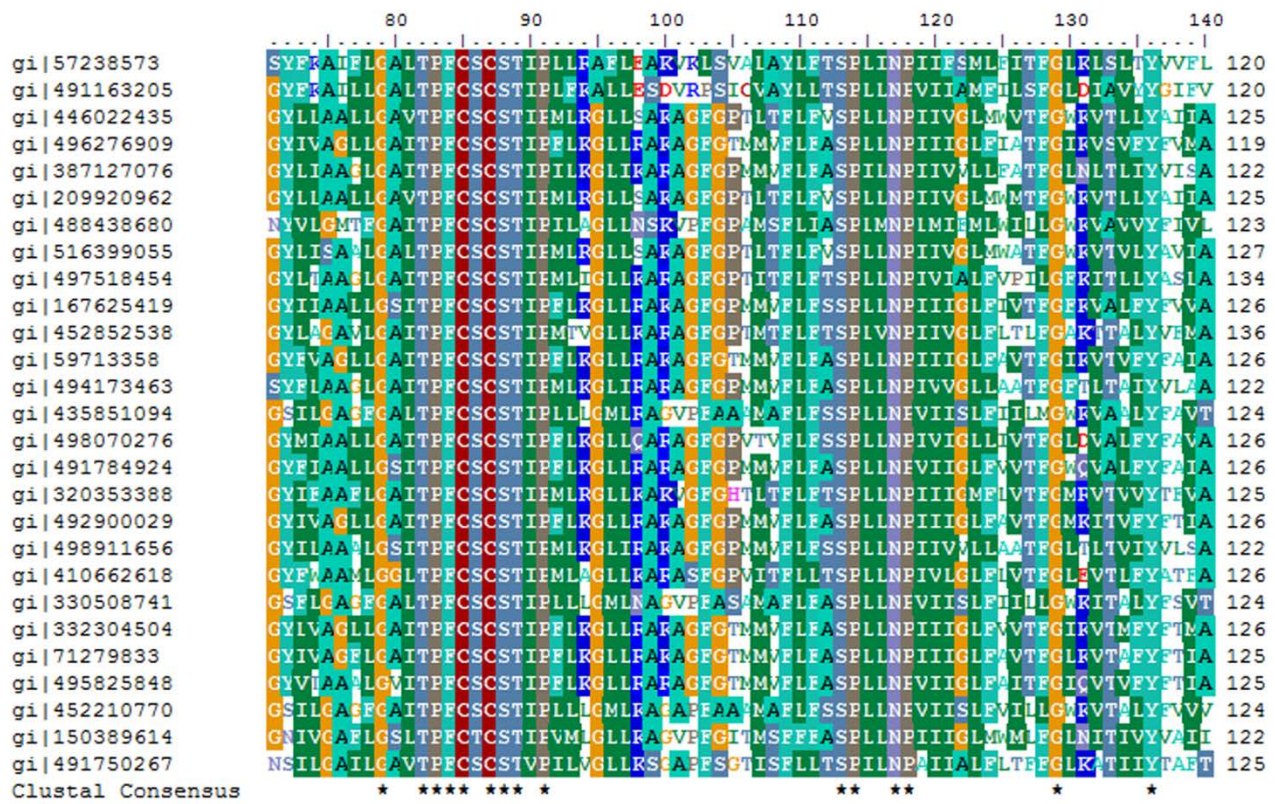

```

      150      160      170      180      190      200      210
gi|57238573  VSLIPIVSEVFSRFRKESFLKGIIPKNTKS-----NIFTQTTHNPSNFIF----- 164
gi|491163205  VFSVEICSELLSEVNSLLIKTE----PKKYSTAFKPTQISNSHLQNAIFTTKANN----- 172
gi|446022435  AGVSVIASIILDSLGFERIIT----ASKSSSANCCAPARTSPGTTYTPPIEVSCCS-----PTAKAIE 183
gi|496276909  MFSVVIAGVLLERLRFERFVKREAYTEPE-----TVKGD-----GFFSN 156
gi|387127076  FVSVLVGGWLLNQMGERYIRDEHYSTAKTVQSCCNTSEESS--TSHAERKDN-----PACCAIE 179
gi|209920962  ACVSVIASIILDSLGFERIIT----ASKSSSANCCAPARTSPGTTYTPPIKVS CCS-----PAAKAIE 183
gi|488438680  AIFSILTGEVFSRMLAESYKGV-----TVKGD-----GFFSN 156
gi|516399055  AGVSVIASYLLDLGFERVVDPKBAKQSSCGTGCGTTTSEPGSVSA---TACCS-----SNAIKSI 186
gi|497518454  LVSVVEAGVLLQSLGFERIKQEMLIPTTKANACASSDSTN-----TVKGD-----GFFSN 176
gi|167625419  MFSVVIAGVTLERLGFERYVKREAYEAAASSSSCCAKPK--NEVKPVATTSCCSTPAPAVAATTSCC SV- 193
gi|452852538  LMLAIEAGWGLHRLRFGREIKODLLDRGSLGGCACSTSTPGGGGDTSVTILMPAMA-----GVQ 195
gi|59713358  MFSVVIAGVLLERLGFERYVKREAYTAPE-----TVKGD-----GFFSN 156
gi|494173463  LHVSLIAGWLLQSLGFERVYRRAATDTASGYEASVNSCGVKP-VATDCESSSCSSTPI---AVGCGSAE 187
gi|435851094  FTTHIILGLLLDLGFAAGIKV-----AAVRN-----CCDSQ 157
gi|498070276  LITSVVSGLLRLGFERYVRDEAYQAA-VSQSACNAGQTSKETPLNPESQCGDR-----K 182
gi|491784924  MFSVVSQGVLERLGFERYVKREAYESAN-TSSCSSQSSCGDTAKVTEATSCCTKSEF-VAAPTSCCTST 194
gi|320353388  LVSVVGGIVLESLGFERVYIPEGKIEAASCCSPNPPTANPAGKNPATEAGSTQPAQGCCASFPMASVQ 195
gi|492900029  MFSVVIAGVTLERLGFERYVKREAYTEPE-----TVKGD-----GFFSN 156
gi|498911656  LHVSLIAGWLLQSLGFERVYRRAATDTASGYEASVNSCGVKP-VATDCESSSCSSTPI---AVGCGSAE 187
gi|410662618  LSVATANGYLLASLGFDRIYRGGVGRSP---SCAEPAVVNG---NADSTGCCSQVQ-----PSGVSID 184
gi|330508741  FLAIVIGIMLDSLGFAAGIKV-----AAVRG-----CCDCE 157
gi|332304504  MFSVVAGELLERLGFERYVRSREAYTEPD-----TVKGD-----GFFSN 156
gi|71279833  MFSVIAGVLLEREGFERVYKREAYTPE-----TVKGD-----GFFSN 156
gi|495825848  LVSVVIAGVTLERLGFERYVKREAYAAP-----TVKGD-----GFFSN 156
gi|452210770  FMSTIATGLLLDLGFSNQIKV-----AAVRN-----RCACE 157
gi|150389614  FEVSVMIGIVLEREGYADSIKAV-----RIANEQQS-----ACCEVE 159
gi|491750267  FIFAVLIGLLLDREGFERVKNV-----SIKGEQSG-----EIVYEN 162
Clustal Consensus

```

```

      220      230      240      250      260      270      280
gi|57238573  ---KQKSCCANTQDKPKNI-----TIN-----YKELKESLRYKRLIPYIVVAVIGAFIH 213
gi|491163205  ---TCCVKTFNNTKA-----TSLKLELQELREYKRIFVYLQIAMIGVFLH 217
gi|446022435  KPV-----VNCCN-----TKAVVSNPIKLATKCALCQFKVLPYLLLVIGSFIY 230
gi|496276909  ---PSCCAKSCSG-TK-----VETN-----KMKRIIDTTWRDFRFFVLPYLLIGIAGSVIY 195
gi|387127076  S---QPADCCDAQPV-----AKTPFQRISKAWSDFFIDVLPYLLVIGIAGSVIY 225
gi|209920962  NPV-----VTCCS-----TKAVVSNPIKLATKCALCQFKVLPYLLLVIGSFIY 230
gi|488438680  K-----SGARVKAQINDAWAHLIYIMLPYLLIGIAGSVIY 191
gi|516399055  KPLKAQASCCAAQPDAASTVSCCADGTAALTQAPVIPTAPAKARIDAWQKQVLPYLLLVIGSFIY 256
gi|497518454  ---KCTSSKK-----APSIWRTAWQETWPLFMSMLPYMIIAMIGSFVH 217
gi|167625419  ---PAAVSSCEBSTATASTCGSSATVKQDN-----RMMFVWRSTWRDFRQVLPYIMLGIIVGSLIY 251
gi|452852538  NPA-----KGEF-----SRWRRIEFDALCQFLRIMPILILGLVIGALLH 234
gi|59713358  ---PKCCGSTCGGEKK-----APQS-----KMKRIINSTWDFRFFVLPYLLIGIAGSVIY 203
gi|494173463  SAGAQSQGGCGSQTTPEPKR-----GRNRYSGLQGEVWSDFFVLPYLLIGIAGSVIY 240
gi|435851094  QGT-----D-----ARSRIERSAGEALSIFRQIMPYLLLVIGIAGFIH 195
gi|498070276  NPT-----GTGKQ-----AENRWLRIRRTIWRDFLTLTPYLLLVIGIAGSVIY 224
gi|491784924  KKEPEVAVSCCASHGATATV--TMTETKQPS-----RMMRIINLSTWRDFRQVLPYIMLGIAGSVIY 253
gi|320353388  DSC--RTPLVETCCSALPTFSPACCTATTE--TDAPAFMLKLRRAFLDGLVQFKIFLYLLLVIGIAGSVIY 262
gi|492900029  ---AKGCASACGG-KQ-----APVS-----KMKRIINSTWDFRFFVLPYLLIGIAGSVIY 202
gi|498911656  QVTTQLTSCCDSQMVKTDRL-----RKSRYSGLQGEVWSDFFVLPYLLIGIAGSVIY 231
gi|410662618  AGG-----CCVVAPVVVAPL-----AG-----RWLRINQESWSDFFRIMPYLVGVALGAFIY 232
gi|330508741  QAE-----D-----AKSRVCRSAREAESLFRQIVPYLLLVIGIAGFIH 195
gi|332304504  ---AATCGACSG-AV-----APVN-----KMKRIIDSTWRDFRFFVLPYLLIGIAGIY 202
gi|71279833  ---SKSCATSCGN-NI-----ETVS-----KMKRIINSTWDFRFFVLPYLLIGIAGSVIY 201
gi|495825848  ---TSSCGSSCGG-SA-----PVQS-----KMKRIINSTWDFRFFVLPYLLIGIAGSVIY 201
gi|452210770  QDT-----N-----AKSRICRSARVAEFSLFRQIMPYLLLVIGIAGFIH 195
gi|150389614  AEE-----GFWNI-----AKRIRRSANMANNLFRQIMPYLVLSAIGAFIA 201
gi|491750267  LEG-----TFLEK-----NILAFKYAFESLVLFRQVFPYLLLVIGIAGSVIY 204
Clustal Consensus

```

\*



Supplementary FIG. 2. Sequence alignment of ArsP homologs in various bacteria and archaea using COBALT. The lengths of these proteins range from 294 to 365 amino acids. Compared with *C. jejuni*, the identities are greater than 30% ( $>5E-43$ ). The sequences are more conserved at the N- and C-terminal regions, while deletions and insertions occur in the middle region of the proteins, which corresponds to the large hydrophilic loop shown in Fig. 2. In order to see the conserved and diverse regions clearly, different amino acids are indicated by different colors. "\*" indicates identical residues among the 27 homologous.
